# Supplementary material for: First-principles study of 2H-Mo2C-based MXenes under biaxial strain as Li-battery anodes
Source: Royal Society of Chemistry journal article supplement (doi:10.1039/d3cp01608k), 2023-01-01
Supplement: d3cp01608k1.pdf [file d3cp01608k1.pdf]

## Supplementary Information

### First-principles study of 2H-Mo<sub>2</sub>C-based MXene under biaxial strain implemented as Li-battery anode.

Satchakorn Khammuang,<sup>a</sup> Anucha Pratumma,<sup>a</sup> Aparporn Sakulkalavek,<sup>b,c</sup> Thanayut Kaewmaraya,<sup>d,e</sup>  
Tanveer Hussain,<sup>f</sup> and Komsilp Kotmool,<sup>a,c,\*</sup>

<sup>a</sup> College of Advanced Manufacturing Innovation, King Mongkut's Institute of Technology Ladkrabang, Bangkok 10520, Thailand; Tel: 66 2329 8264; E-mail: komsilp.ko@kmitl.ac.th

<sup>b</sup> Department of Physics, School of Science, King Mongkut's Institute of Technology Ladkrabang, Bangkok, 10520, Thailand

<sup>c</sup> Electronic and Optoelectronic Device Research Unit, School of Science, King Mongkut's Institute of Technology Ladkrabang, Bangkok 10520, Thailand

<sup>d</sup> Integrated Nanotechnology Research Center, Department of Physics, Khon Kaen University, Khon Kaen, Thailand

<sup>e</sup> Institute of Nanomaterials Research and Innovation for Energy (IN-RIE), NANOTECKKU RNN on Nanomaterials Research and Innovation for Energy, Khon Kaen University, Khon Kaen, 40002, Thailand

<sup>f</sup> School of Science and Technology, University of New England, Armidale, New South Wales 2351, Australia

**Table S1** Comparison of adsorption energy ( $E_{ad}$ ), bond population of Mo-Li (for Mo<sub>2</sub>C) or O-Li (for Mo<sub>2</sub>CO<sub>2</sub>), and adsorption height (H) between an adsorbed Li-ion at S3 site and an adsorbed Li layer.

| Configurations of Li-ion            |           | $E_{ad}$ (eV) |       |       | Bond population |       |       | H (Å) |       |       |
|-------------------------------------|-----------|---------------|-------|-------|-----------------|-------|-------|-------|-------|-------|
|                                     |           | -4%           | 0%    | 4%    | -4%             | 0%    | 4%    | -4%   | 0%    | 4%    |
| <b>Mo<sub>2</sub>C</b>              | Li-ion@S3 | -0.88         | -0.96 | -1.31 | -0.42           | -0.41 | -0.40 | 2.280 | 2.262 | 2.217 |
|                                     | Li layer  | -0.49         | -0.50 | -0.68 | -0.72           | -0.61 | -0.56 | 2.285 | 2.261 | 2.216 |
| <b>Mo<sub>2</sub>CO<sub>2</sub></b> | Li-ion@S3 | -3.15         | -3.13 | -3.08 | -0.13           | -0.14 | -0.15 | 1.151 | 1.131 | 1.089 |
|                                     | Li layer  | -0.87         | -0.95 | -1.07 | -0.12           | -0.11 | -0.10 | 1.057 | 0.952 | 0.819 |

To address the opposite trend of strain dependent  $E_{ad}$  of these two MXenes, the different interactions between Mo-Li for Mo<sub>2</sub>C and O-Li for Mo<sub>2</sub>CO<sub>2</sub> are considered. According to Table 1S, the more extended adsorption height (H) of an adsorbed Li-ion on Mo<sub>2</sub>C reflects weaker interactions than its counterpart. This is also supported by less negative adsorption energy and a more negative bond population (corresponding to higher antibonding levels). Interestingly, we have observed that the bond population is less negative (-0.42 to -0.40) for Mo<sub>2</sub>C from -4% to 4%; meanwhile, it is more negative (-0.13 to -0.15) for Mo<sub>2</sub>CO<sub>2</sub>. The stronger repulsion of enhancing antibonding of Mo<sub>2</sub>CO<sub>2</sub> (also increase energy of the system) might be a reason why the trend of an adsorbed Li-ion on Mo<sub>2</sub>CO<sub>2</sub> is opposite to that of Mo<sub>2</sub>C.

Moreover, one can observe that the tendency of  $E_{ad}$  of  $\text{Mo}_2\text{CO}_2$  when considering adsorbed Li layer, flips to be the same trend with that of  $\text{Mo}_2\text{C}$ . According to Table 1S, the H of an adsorbed Li layer ( $H=1.131 \text{ \AA}$  at S3 and  $\epsilon=0\%$ ) is significantly lower than that of an adsorbed Li-ion ( $H=0.952 \text{ \AA}$  at  $\epsilon=0\%$ ). This indicates that it has stronger interaction compared with another. To clarify the change of tendency of adsorption energy when decoration the Li layer on  $\text{Mo}_2\text{CO}_2$ , the reduction of H respecting that of an adsorbed Li-ion to be  $0.094 \text{ \AA}$ ,  $0.179 \text{ \AA}$ , and  $0.270 \text{ \AA}$  for strains of  $-4\%$ ,  $0\%$ , and  $4\%$ , respectively. It also corresponds to the reduction of antibonding (also decreasing energy of the system) of  $\text{Mo}_2\text{CO}_2$  from compression to tension. Therefore, this finding supports that the  $E_{ad}$  of the adsorbed Li layers increases (more negative) with the arial expansion of  $\text{Mo}_2\text{CO}_2$  monolayer.

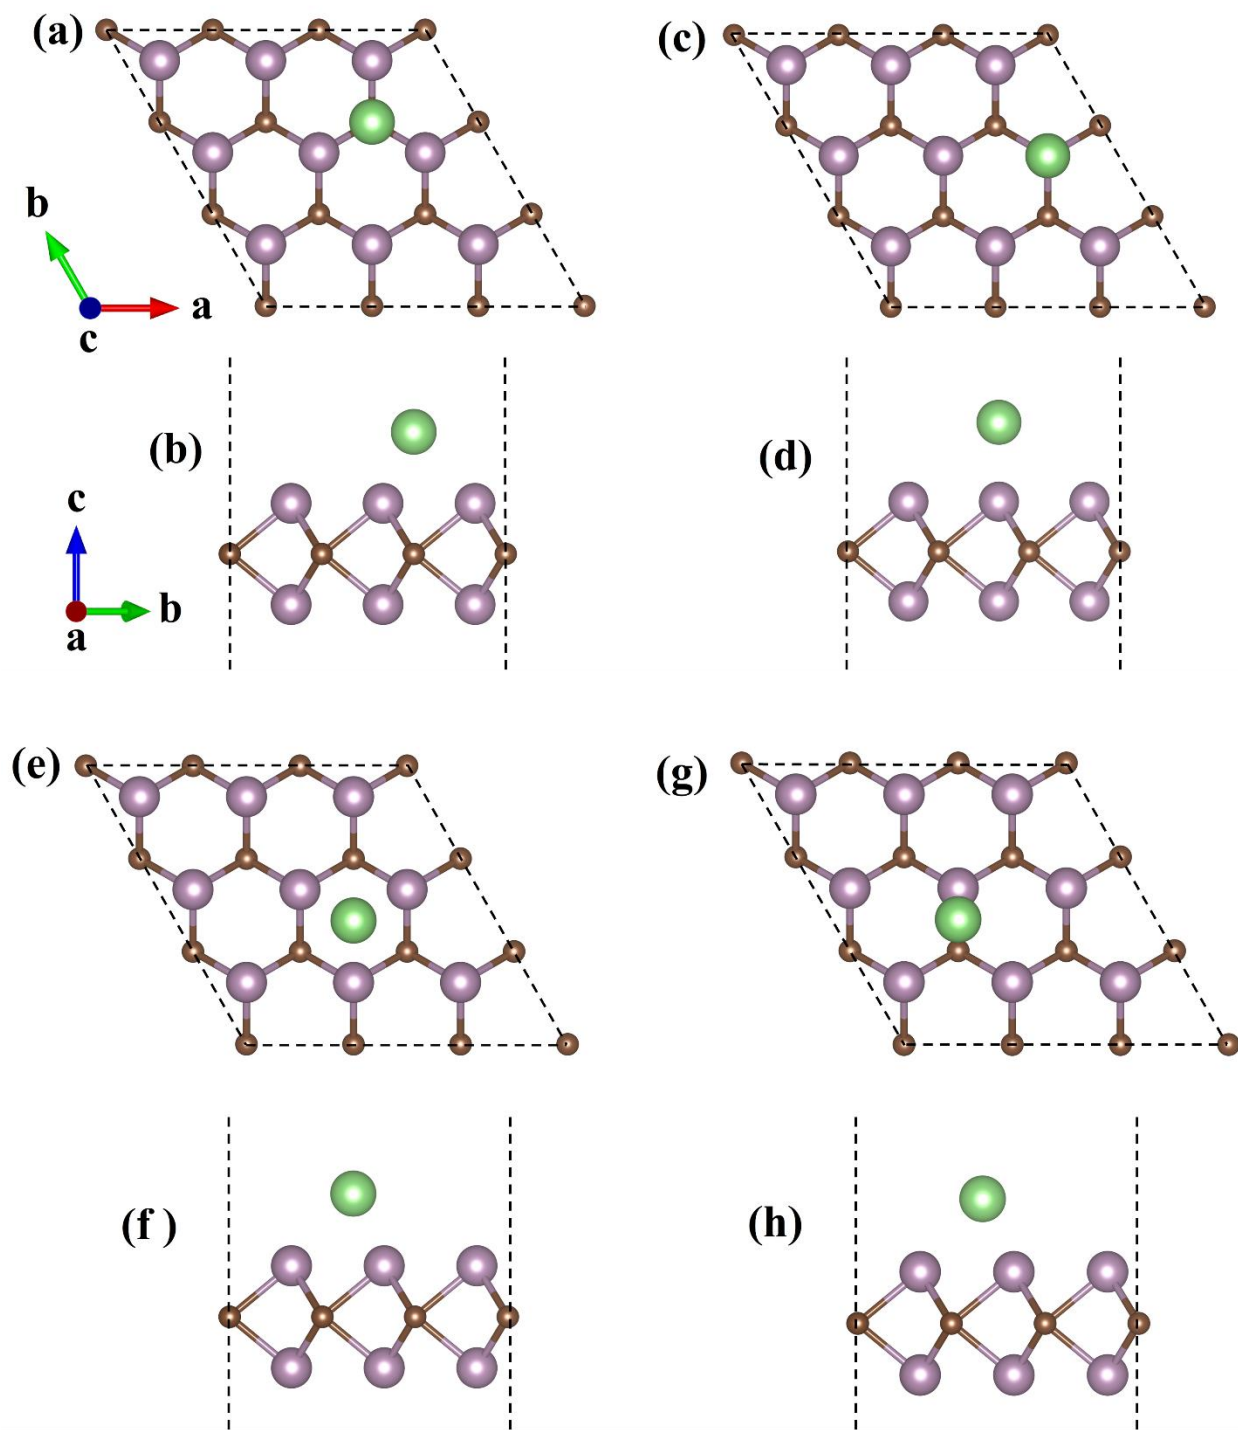

**Fig. 1S** Top and side views of the Li positions on Mo<sub>2</sub>C at the different sites consisting of S1 (a, b), S2 (c, d), S3 (e, f), and S4 (g, h). The brown, purple, and green balls represent C, Mo, and Li atoms, respectively.

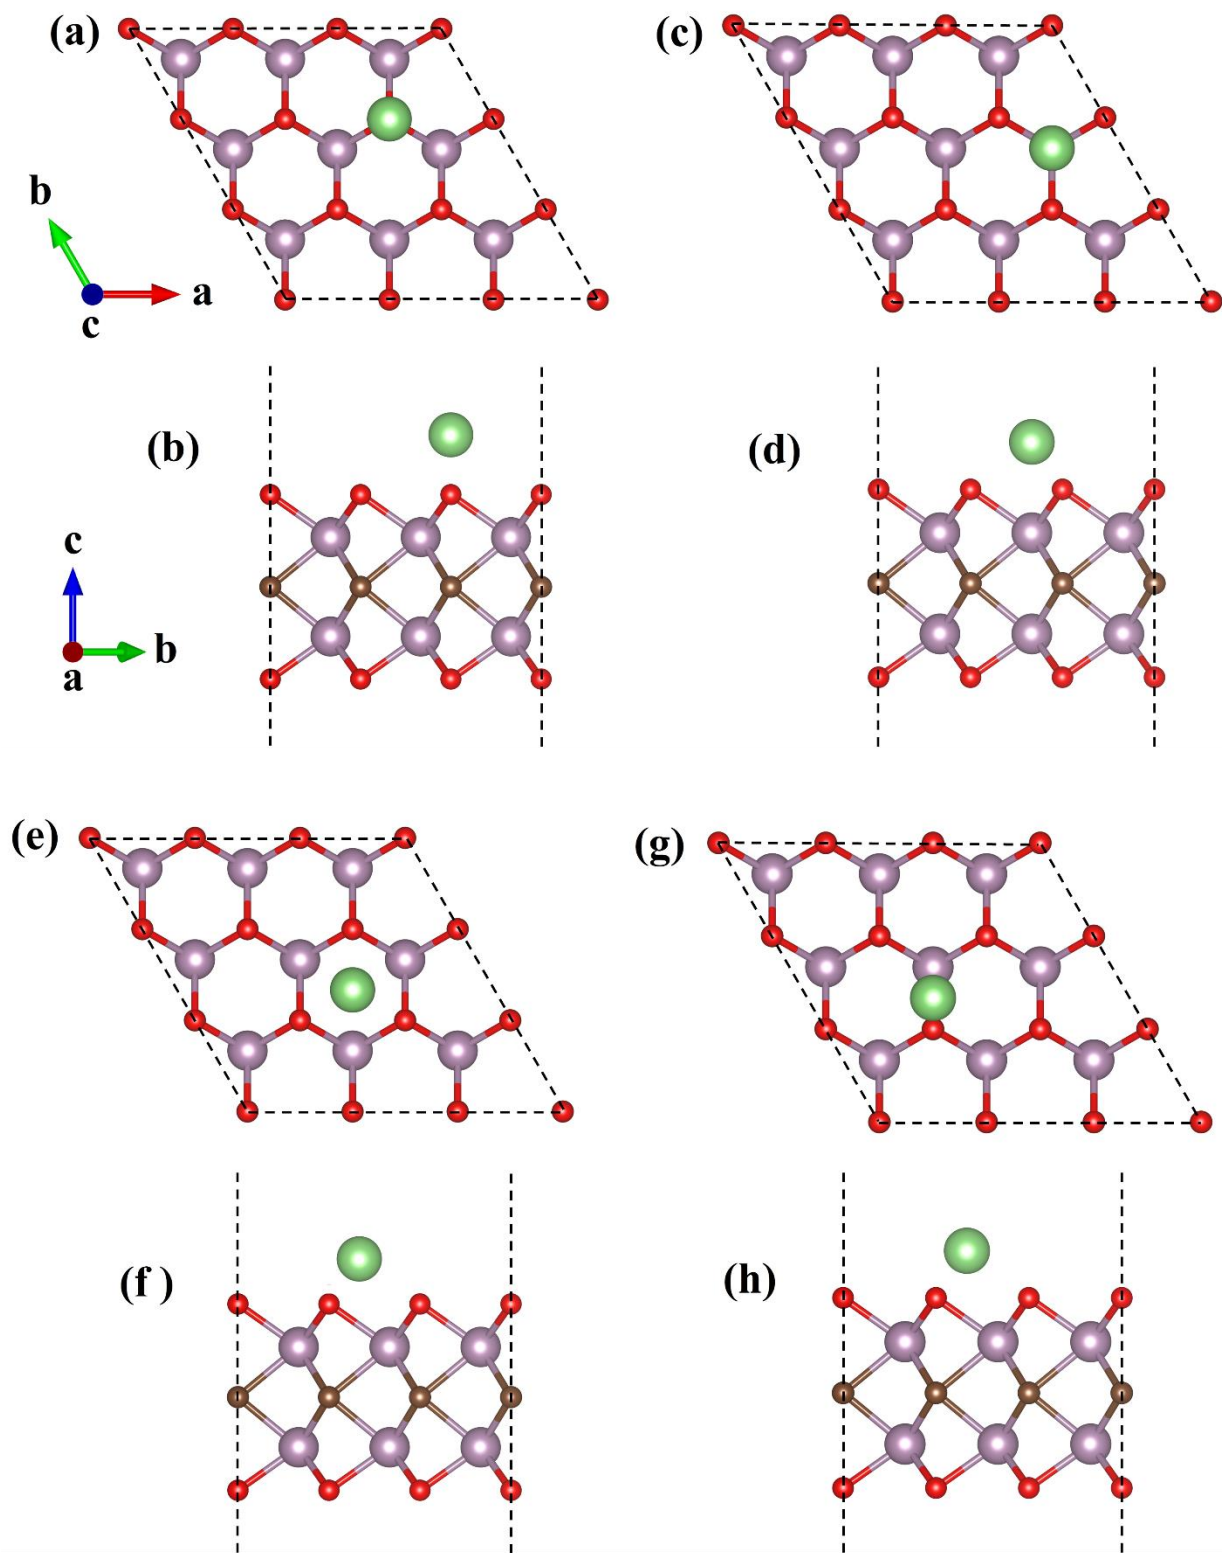

**Fig. 2S** Top and side views of the Li positions on  $\text{Mo}_2\text{CO}_2$  at the different sites consisting of S1 (a, b), S2 (c, d), S3 (e, f), and S4 (g, h). The brown, purple, red and green balls represent C, Mo, O, and Li atoms, respectively.

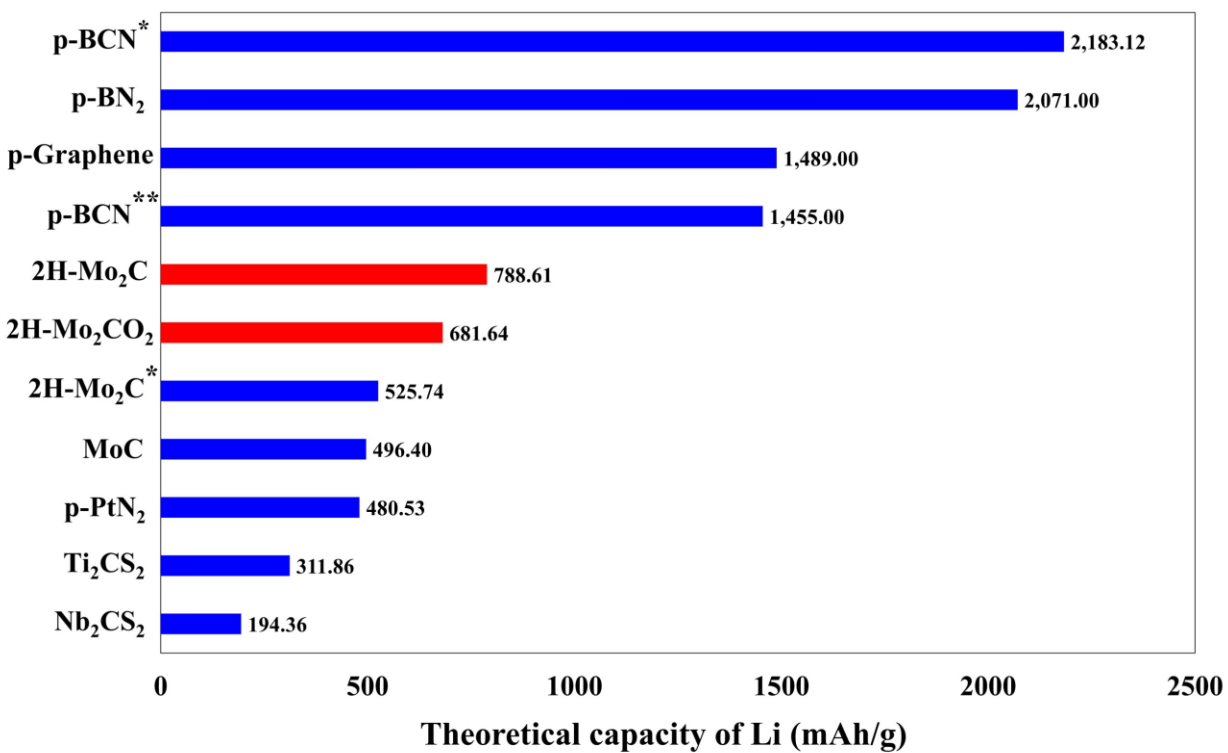

**Fig. 3S** The theoretical capacities of some promising anode materials for Li-ion batteries with corresponding references including p-BNC\* [1], p-BN<sub>2</sub>[2], p-Graphene[3], p-BNC\*\* [4], 2H-Mo<sub>2</sub>C\* [5], p-PtN<sub>2</sub>[6], MoC[7], Ti<sub>2</sub>CS<sub>2</sub>[8], and Nb<sub>2</sub>CS<sub>2</sub>[9].

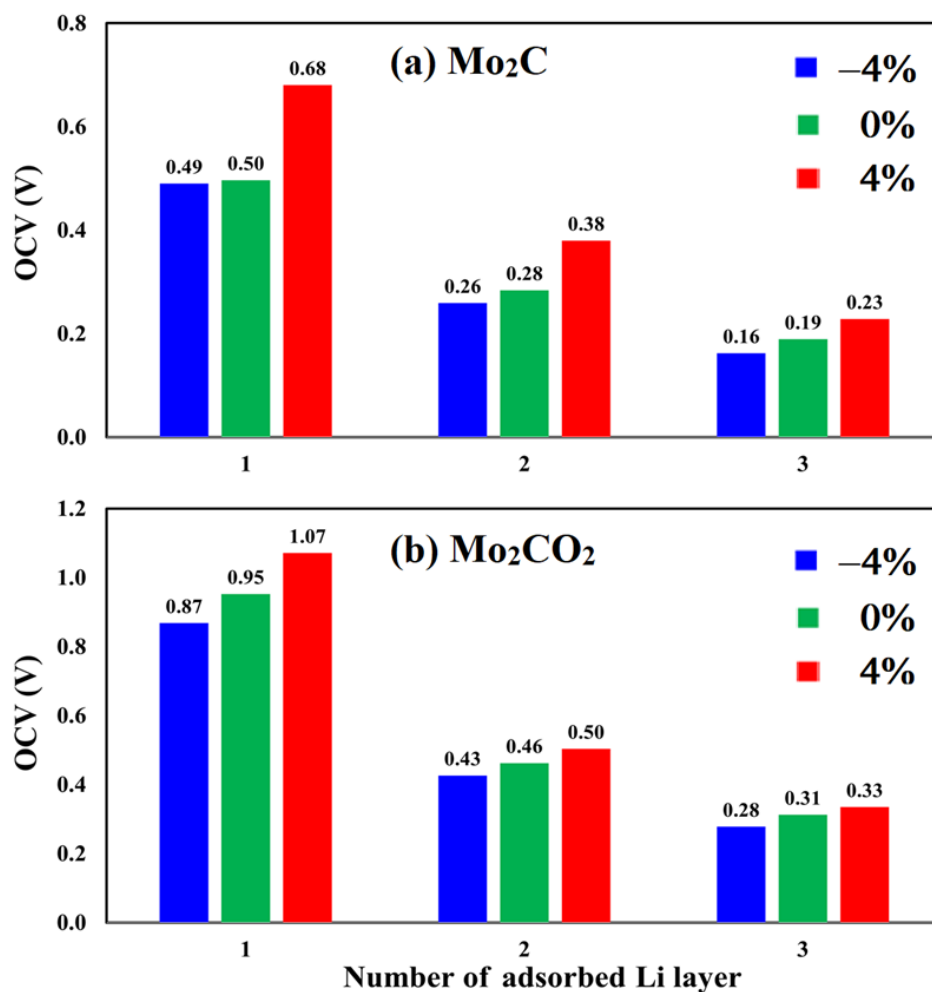

**Fig. 4S** The OCV of number of adsorbed Li layers on (a) Mo<sub>2</sub>C and (b) Mo<sub>2</sub>CO<sub>2</sub> at certain biaxial strains at -4%, 0%, and 4%.

## REFERENCES

- [1] L. Chen, M. Yang, F. Kong, W. Du, J. Guo, and H. Shu, "Penta-BCN monolayer with high specific capacity and mobility as a compelling anode material for rechargeable batteries," *Physical Chemistry Chemical Physics*, 10.1039/D1CP03017E vol. 23, no. 32, pp. 17693-17702, 2021, doi: 10.1039/D1CP03017E.
- [2] T. Zhang, Y. Ma, B. Huang, and Y. Dai, "Two-Dimensional Penta-BN<sub>2</sub> with High Specific Capacity for Li-Ion Batteries," *ACS Applied Materials & Interfaces*, vol. 11, no. 6, pp. 6104-6110, 2019/02/13 2019, doi: 10.1021/acsami.8b20566.
- [3] B. Xiao, Y.-c. Li, X.-f. Yu, and J.-b. Cheng, "Penta-graphene: A Promising Anode Material as the Li/Na-Ion Battery with Both Extremely High Theoretical Capacity and Fast Charge/Discharge Rate," *ACS Applied Materials & Interfaces*, vol. 8, no. 51, pp. 35342-35352, 2016/12/28 2016, doi: 10.1021/acsami.6b12727.

- [4] A. Ananchuensook *et al.*, "Towards a new packing pattern of Li adsorption in two-dimensional pentagonal BCN," *Physical Chemistry Chemical Physics*, 10.1039/D2CP00280A vol. 24, no. 21, pp. 13194-13200, 2022, doi: 10.1039/D2CP00280A.
- [5] Q. Sun, Y. Dai, Y. Ma, T. Jing, W. Wei, and B. Huang, "Ab Initio Prediction and Characterization of Mo<sub>2</sub>C Monolayer as Anodes for Lithium-Ion and Sodium-Ion Batteries," *The Journal of Physical Chemistry Letters*, vol. 7, no. 6, pp. 937-943, 2016/03/17 2016, doi: 10.1021/acs.jpcelett.6b00171.
- [6] C. Lei, D. Wenling, G. Jiyuan, S. Huabing, W. Ying, and D. Jun, "Modelling of monolayer penta-PtN<sub>2</sub> as an anode material for Li/Na-ion storage," *Materials Chemistry and Physics*, vol. 262, p. 124312, 2021, doi: <https://doi.org/10.1016/j.matchemphys.2021.124312>.
- [7] Y. Yu, Z. Guo, Q. Peng, J. Zhou, and Z. Sun, "Novel two-dimensional molybdenum carbides as high capacity anodes for lithium/sodium-ion batteries," *Journal of Materials Chemistry A*, 10.1039/C9TA02650A vol. 7, no. 19, pp. 12145-12153, 2019, doi: 10.1039/C9TA02650A.
- [8] W. Yatong *et al.*, "Achieving superior high-capacity batteries with the lightest Ti<sub>2</sub>C MXene anode by first-principles calculations: Overarching role of S-functionate (Ti 2CS<sub>2</sub>) and multivalent cations carrier," *Journal of Power Sources*, vol. 451, p. 227791, 2020, doi: <https://doi.org/10.1016/j.jpowsour.2020.227791>.
- [9] Y. Jing, J. Liu, Z. Zhou, J. Zhang, and Y. Li, "Metallic Nb<sub>2</sub>S<sub>2</sub>C Monolayer: A Promising Two-Dimensional Anode Material for Metal-Ion Batteries," *The Journal of Physical Chemistry C*, vol. 123, no. 44, pp. 26803-26811, 2019/11/07 2019, doi: 10.1021/acs.jpcc.9b07950.
